# Supplementary material for: Relationship between traditional risk factors for hypertension and systolic blood pressure in the Tohoku Medical Megabank Community-based Cohort Study
Source: PubMed Central journal article supplement (PMC11150157; doi:10.1038/s41440-024-01582-1), 2024-02-29

Supplemental Fig.5

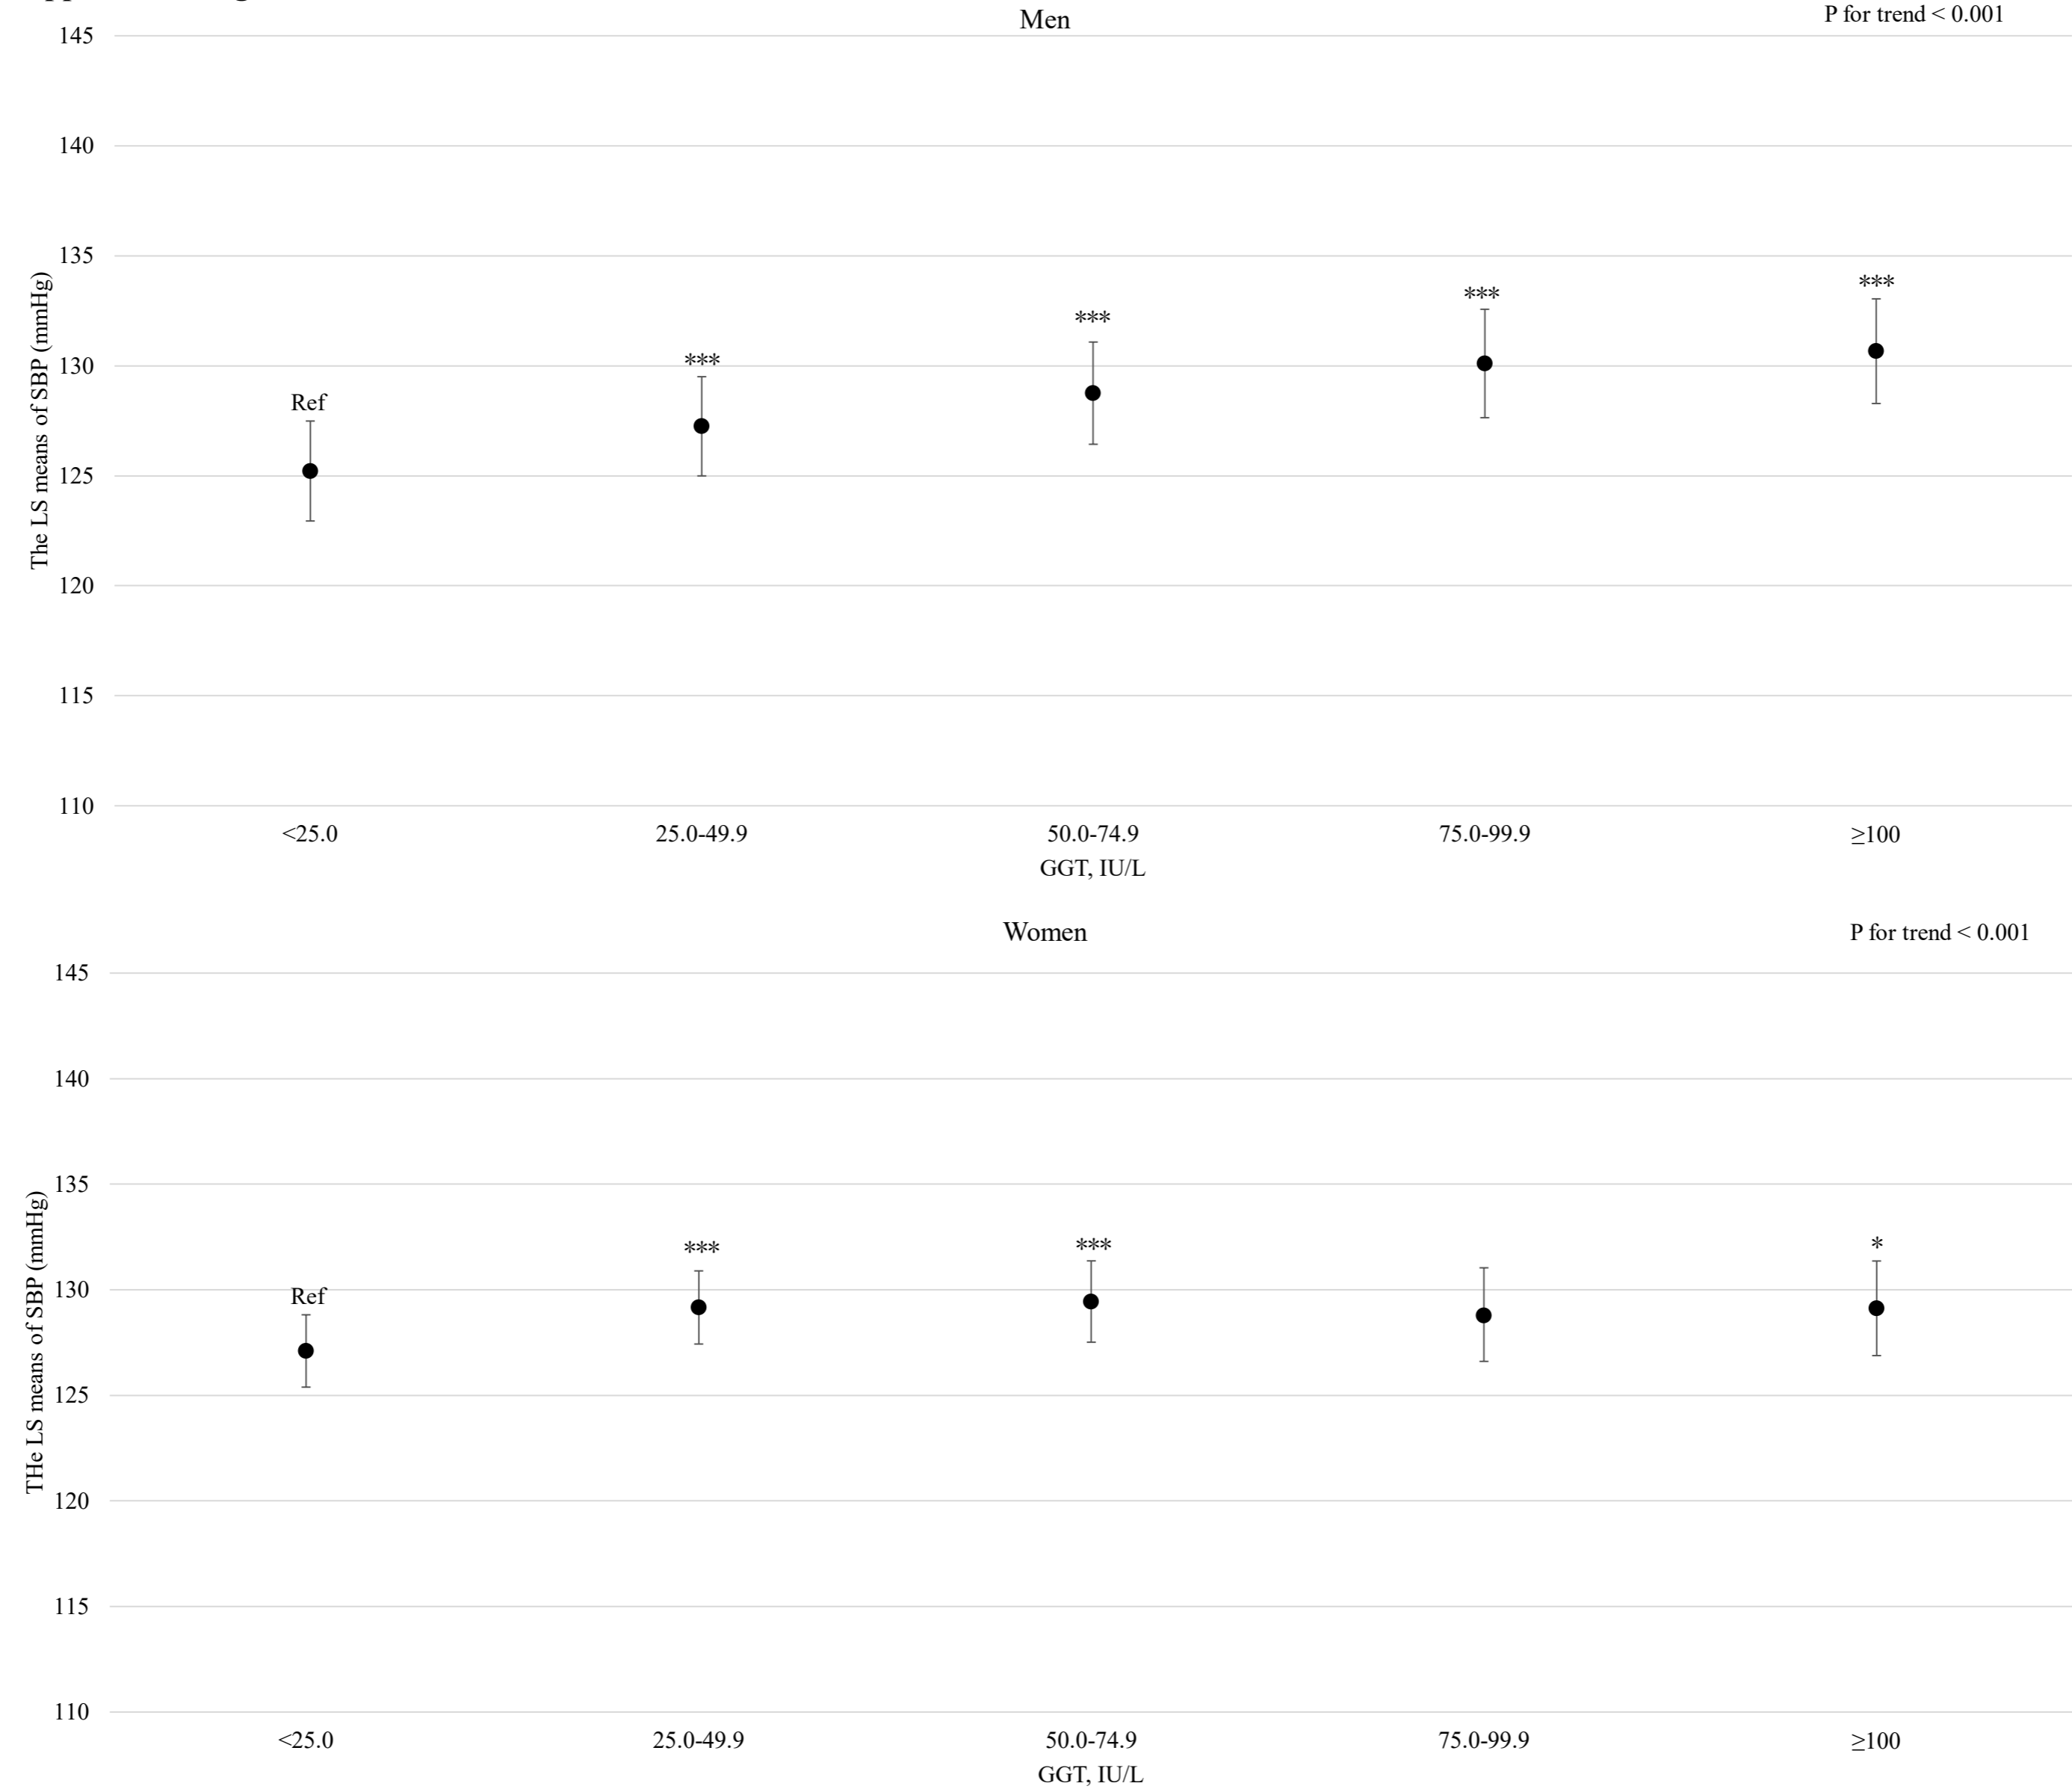

Supplement: 41440_2024_1582_MOESM7_ESM.pdf [file 41440_2024_1582_MOESM7_ESM.pdf]
